# Supplementary material
Source: PubMed Central journal article supplement (PMC6438323)
Supplement: sc8b06081_si_001.pdf [file sc8b06081_si_001.pdf]

## Supporting Information

# Conductive carbon microfibers derived from wet-spun lignin/nanocellulose hydrogels

*Ling Wang,<sup>†</sup> Mariko Ago,<sup>§</sup> Maryam Borghei,<sup>†</sup> Amal Ishaq,<sup>†</sup> Anastassios C. Papageorgiou,<sup>‡</sup> Meri Lundahl,<sup>†</sup> and Orlando J. Rojas<sup>\*,†</sup>*

<sup>†</sup>Department of Bioproducts and Biosystems, Aalto University, P.O. Box 16300, 00076 Aalto, Finland

<sup>§</sup>Department of Chemical and Paper Engineering, Western Michigan University, Kalamazoo MI 49008-5200, USA

<sup>‡</sup>Turku Centre for Biotechnology, University of Turku and Åbo Akademi University, 20520 Turku, Finland

\* Orlando J. Rojas. Email: [orlando.rojas@aalto.fi](mailto:orlando.rojas@aalto.fi) Tel: +358 505124227.

This Supporting Information document contains five figures in five (5) pages:

Figure S1. Magnified SEM images from the surface of the cellulose/lignin microfibers.

Figure S2. Azimuthal profiles of (200) reflection obtained from WAXS diagram of lignin/cellulose composite microfibers.

Figure S3. Stress-strain curve of TOCNF microfibers coagulated from acetone under same wet spinning conditions as TOCNF coagulated from CaCl<sub>2</sub>.

Figure S4. Mechanical properties of C/L70c and a image of bended carbon microfibers.

Figure S5. Raman spectra for CMF from different precursors.

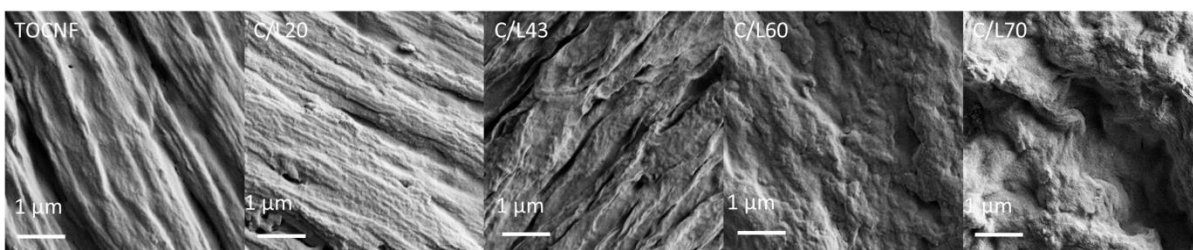

Figure S1. Magnified SEM images from the surface of the cellulose/lignin microfibers.

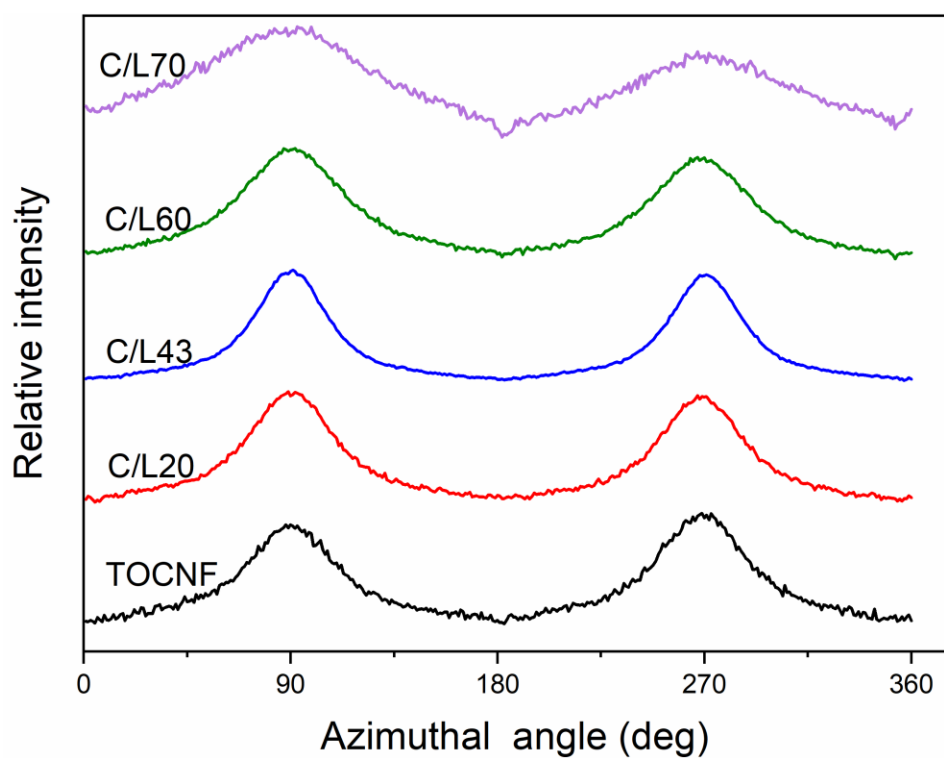

Figure S2. Azimuthal profiles of (200) reflection obtained from WAXS diagram of lignin/cellulose composite microfibers.

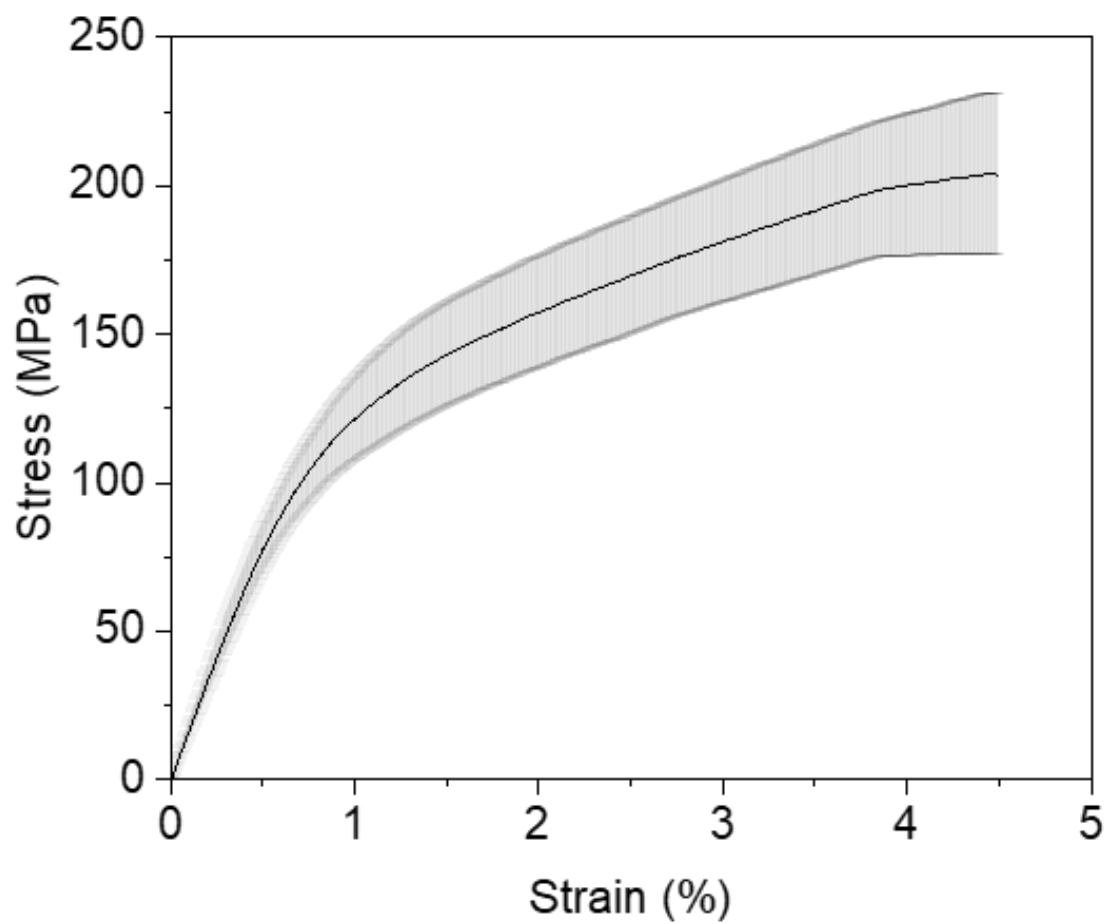

**Figure S3.** Stress-strain curve of TOCNF microfibers coagulated from acetone under same wet spinning conditions as TOCNF coagulated from  $\text{CaCl}_2$ .

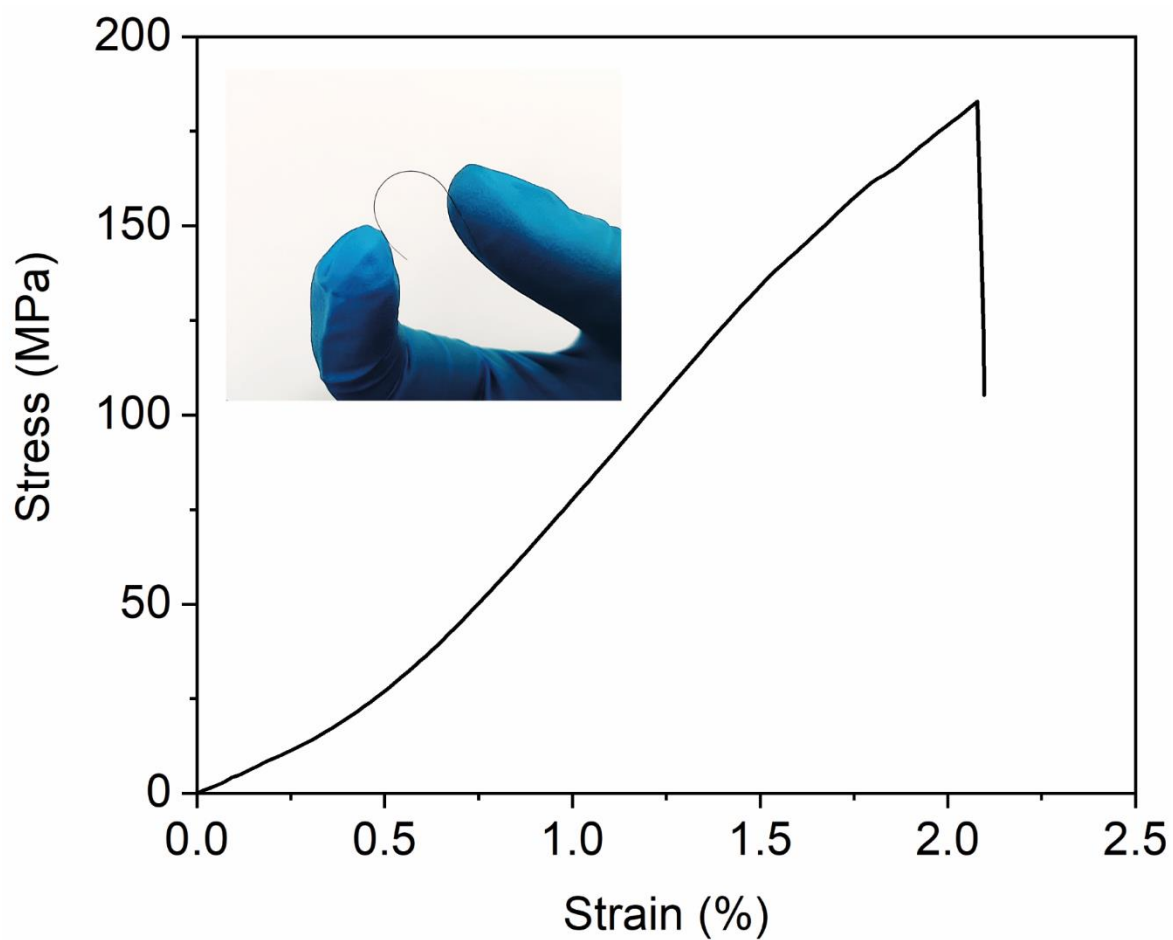

**Figure S4.** Mechanical properties of C/L70c. Inset is a bended 3 cm long CMF.

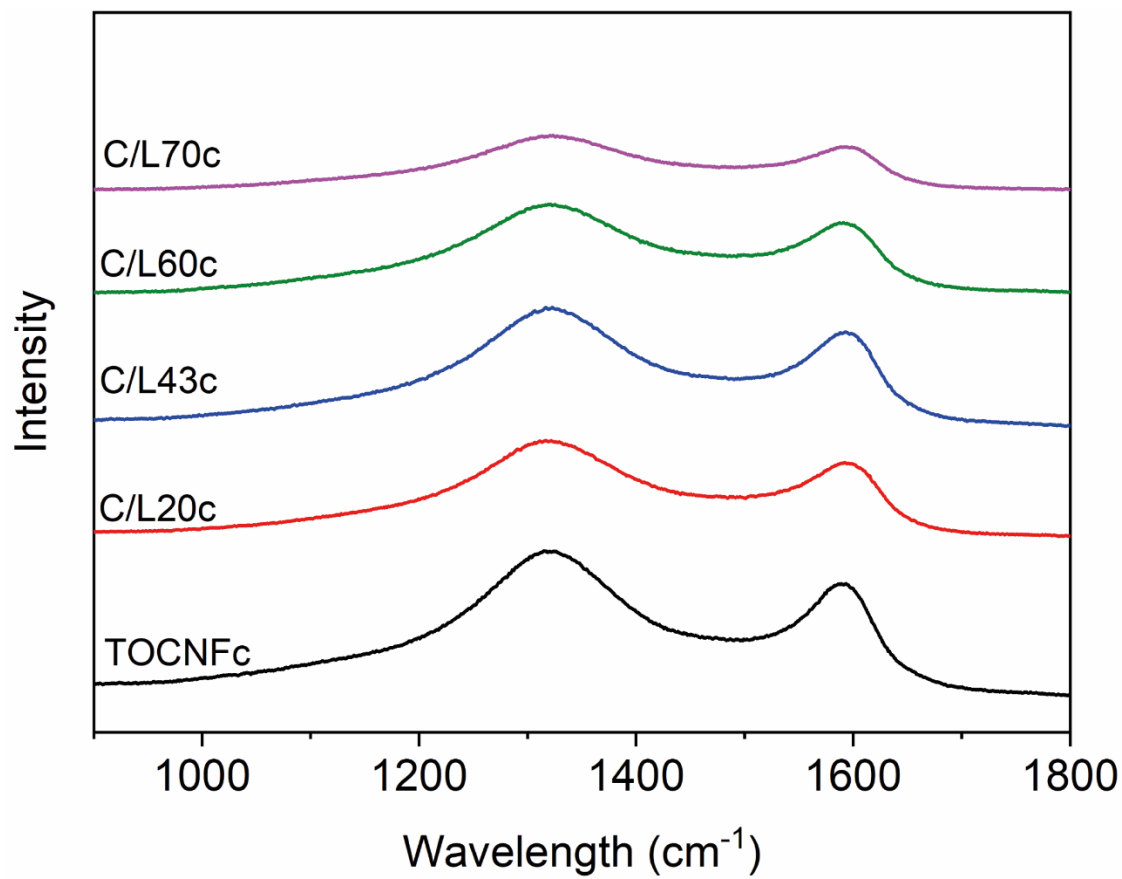

**Figure S5.** Raman spectra for CMF from different precursors.
